# Supplementary material for: Accumulated promoter methylation as a potential biomarker for esophageal cancer
Source: PubMed Central journal article supplement (PMC5352188; doi:10.18632/oncotarget.13510), 2016-11-22
Supplement: oncotarget-08-679-s001.pdf [file oncotarget-08-679-s001.pdf]

## Accumulated promoter methylation as a potential biomarker for esophageal cancer

### Supplementary Materials

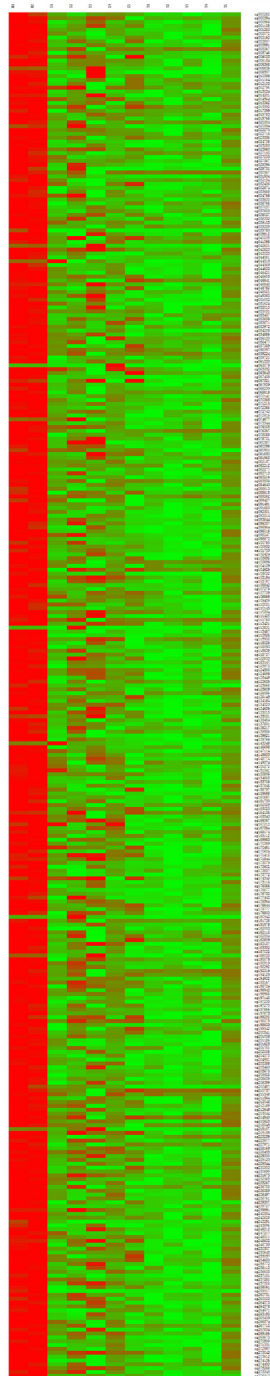

**Supplementary Figure S1: Hierarchical clustering of methylation between esophageal cancer tissues and normal controls.** The heat map of these genes shows different methylation between cancer, remote normal-appearing and healthy control tissues. Green indicates hypermethylation, while red indicates hypomethylation. Columns represent samples. Rows represent CG loci.

**Supplementary Figure S2: Description of candidate genes.** See Supplementary\_Figure\_S2
